# Supplementary material for: A critical review on the potential impacts of neonicotinoid insecticide use: current knowledge of environmental fate, toxicity, and implications for human health
Source: Royal Society of Chemistry journal article supplement (doi:10.1039/c9em00586b), 2020-01-01
Supplement: c9em00586b1.pdf [file c9em00586b1.pdf]

Supplemental Materials

A critical review on the potential impacts of neonicotinoid insecticide use: current knowledge of environmental fate, toxicity and implications for human health

There are over 1000 U.S. Environmental Protection Agency (EPA) primary and supplementary registered neonicotinoid-containing products on the market. The EPA allows primary registrants to distribute or sell their registered product under another company’s name or their name. The distributor, or sub-registrant, product is referred to as a “supplemental registration” or “distributor product.” As of August 2019, there were 58 primary registrants (50 sub-registrants) for acetamiprid, 44 primary registrants (50 sub-registrants) for clothianidin, 59 primary registrants (26 sub-registrants) dinotefuran, 460 primary registrants (407 sub-registrants) for imidacloprid, and 66 primary registrants (42 sub-registrants) for thiamethoxam.<sup>1</sup> Examples of other agricultural and non-agricultural uses for the neonicotinoids are presented below.<sup>2</sup> Updated information on currently approved uses for EPA registered pesticides are listed in the EPA supporting documents at the EPA’s Schedule for Review of Neonicotinoid Pesticides website.<sup>2</sup>

Table S-1. Examples of Agricultural and Non-Agricultural EPA Registered Uses of Neonicotinoids <sup>a</sup>

| Neonicotinoid | Agricultural Uses                                                                                                                                                                                                       |                                                                                                                                                                                                                                       | Non-Agricultural Uses                                                                                                                                                                                                                               |                                                                                                                                                                                                                                                                                                                        |
|---------------|-------------------------------------------------------------------------------------------------------------------------------------------------------------------------------------------------------------------------|---------------------------------------------------------------------------------------------------------------------------------------------------------------------------------------------------------------------------------------|-----------------------------------------------------------------------------------------------------------------------------------------------------------------------------------------------------------------------------------------------------|------------------------------------------------------------------------------------------------------------------------------------------------------------------------------------------------------------------------------------------------------------------------------------------------------------------------|
| Acetamiprid   | asparagus<br>bush berries<br>cane berries<br>citrus<br>clover grown for seed<br>cotton<br>crops grown for oil<br>edible-podded legumes<br>forage crops (alfalfa, clover)<br>forest trees<br>head and stem cole<br>crops | low growing berries<br>onions and other bulbs<br>vegetables<br>ornamental and flowering plants<br>pome fruit<br>soybeans<br>stone fruits<br>succulent shelled peas and beans<br>sweet corn<br>tobacco<br>tuberous and corm vegetables | ant control (dens, hills, mounds)<br>commercial and private households<br>eating establishments<br>food and feed processing plants or areas<br>food marketing<br>hospitals<br>industrial and institutional maintenance<br>irrigation supply systems | outdoor (perimeter only) general household pest control<br>outdoor and indoor insect control when formulated as a bait for flies<br>outdoor buildings and structures<br>poultry houses<br>public health uses<br>storage and distribution facilities<br>termite control<br>wood and wood structure protection treatment |
| Clothianidin  | artichokes<br>berry and small fruits<br>bulb vegetables<br>cereal grains<br>corn (field, pop, and sweet)<br>cotton<br>figs                                                                                              | peach<br>pome fruit<br>pomegranate<br>rice<br>root and tuber vegetables<br>seed treatment<br>stone fruits                                                                                                                             | airfields, airport buildings<br>cockroach gel<br>domestic dwellings<br>golf courses<br>Indoor and outdoor house<br>fly bait and insecticide<br>interior landscapes                                                                                  | playgrounds<br>poultry houses<br>residential and commercial building use to treat all life stages of bed bugs<br>schools<br>sod farms<br>turfgrass                                                                                                                                                                     |

|              |                                                                                                                                                                                                                                                                                                    |                                                                                                                                                                                                                     |                                                                                                                                                                                                                                                                                                                                                                                                                                  |                                                                                                                                                                                                                                                                                                                                                                                                                                                                                                                    |
|--------------|----------------------------------------------------------------------------------------------------------------------------------------------------------------------------------------------------------------------------------------------------------------------------------------------------|---------------------------------------------------------------------------------------------------------------------------------------------------------------------------------------------------------------------|----------------------------------------------------------------------------------------------------------------------------------------------------------------------------------------------------------------------------------------------------------------------------------------------------------------------------------------------------------------------------------------------------------------------------------|--------------------------------------------------------------------------------------------------------------------------------------------------------------------------------------------------------------------------------------------------------------------------------------------------------------------------------------------------------------------------------------------------------------------------------------------------------------------------------------------------------------------|
|              | legume vegetables (soybeans)<br>non-bearing fruits and nut trees<br><br>low-growing berries<br>oilseed crops (canola, corn, cotton)                                                                                                                                                                | soybeans<br>strawberries<br>tobacco<br>tuberous and corm vegetables                                                                                                                                                 | livestock pens<br>ornamentals                                                                                                                                                                                                                                                                                                                                                                                                    | wheat, triticale, teosinte, buckwheat, sorghum                                                                                                                                                                                                                                                                                                                                                                                                                                                                     |
| Dinotefuran  | brassica head and stem vegetables<br>cottonseed<br>forest trees<br>fruit trees – non bearing<br>greenhouse grown tomatoes<br>low growing berries<br>onion, bulb and green<br>ornamentals in indoor and outdoor nurseries, greenhouses<br><br>outdoor and indoor landscapes (including residential) | peach, nectarine<br>pineapple<br>rice<br>small fruit vine climbing tree plantations (including Christmas trees)<br>tuberous and corm vegetables<br>vegetable transplants grown in enclosed structures<br>watercress | animal premises<br>commercial<br>institutional/industrial buildings<br>control of stable flies<br>fly control in industrial, commercial, and agricultural settings<br>flea and bedbug control in indoor environments<br>flea and bedbug control in homes, hotels, commercial structures, kennels, veterinary clinics<br>food handling establishments<br>general insecticide control in homes, institutions, warehouses and barns | hospitals<br>fly control in indoor/outdoor environments<br>lawns and turfgrass (residential, recreational and commercial turfgrass including golf courses)<br>outside surface of buildings<br>pets (cats and dogs) – spot- on treatment<br>picnic areas<br>structural and perimeter control (indoor and outdoor) – ant and roach baits<br>structural and perimeter control (indoor and outdoor) in commercial, institutional, industrial, food/feed, handling, and residential premises<br>transportation vehicles |
| Imidacloprid | artichokes<br>bananas<br>beans/peas<br>bulb vegetables<br>bush berries<br>cane berries<br>Christmas trees<br>citrus<br>coffee<br>cotton<br>cranberries<br>herbs and spices                                                                                                                         | lettuce<br>ornamental plantings<br>oyster beds (WA State)<br>peanuts<br>pomegranates<br>potatoes<br>roots and tubers<br>seed treatment<br>soybeans<br>stone fruit<br>strawberries<br>sugar beets                    | agricultural /farm premises<br>animal sleeping quarters<br>commercial/industrial lawns<br>commercial/institutional premises and equipment<br>drainage systems<br>food processing<br>forestry<br>golf course turf<br>Indoor and outdoor residential<br>indoor residential (crack and                                                                                                                                              | ornamental lawns and turf<br>ornamental sod farms (turf)<br>ornamentals (grown in nurseries and greenhouses)<br>paths/patios<br>pets (cats and dogs) – spot- on treatment and collar<br>plantations<br>plastics products<br>pre- and post-construction termiticide<br>recreational and residential lawns<br>residential ornamental                                                                                                                                                                                 |

|              |                                                                                                                                                                                                                                                                             |                                                                                                                                                                                                                     |                                                                                                                                                                                                                                                                          |                                                                                                                                                                                                                     |
|--------------|-----------------------------------------------------------------------------------------------------------------------------------------------------------------------------------------------------------------------------------------------------------------------------|---------------------------------------------------------------------------------------------------------------------------------------------------------------------------------------------------------------------|--------------------------------------------------------------------------------------------------------------------------------------------------------------------------------------------------------------------------------------------------------------------------|---------------------------------------------------------------------------------------------------------------------------------------------------------------------------------------------------------------------|
|              | hops<br>legume vegetables                                                                                                                                                                                                                                                   | tropical fruit                                                                                                                                                                                                      | crevice)<br>indoor residential – bed bugs)<br>wood preservative<br>wood protection treatment to<br>buildings/products                                                                                                                                                    | lawns/turf<br>textiles/textile fibers/cordage                                                                                                                                                                       |
| Nitenpyram   | No Current EPA registered pesticide uses                                                                                                                                                                                                                                    |                                                                                                                                                                                                                     | Regulated by the FDA as an oral formulation (i.e., tablet) for dogs and cats as a flea adulticide                                                                                                                                                                        |                                                                                                                                                                                                                     |
| Thiacloprid  | No Current EPA registered pesticide uses                                                                                                                                                                                                                                    |                                                                                                                                                                                                                     |                                                                                                                                                                                                                                                                          |                                                                                                                                                                                                                     |
| Thiamethoxam | artichokes<br>barley<br>bush berries<br>cane berries<br>Christmas trees<br>citrus<br>cotton<br>cranberries<br>leafy green vegetables<br>low growing berries<br>mint/spearmint/ peppermint<br>ornamentals in greenhouses,<br>lath- and shade-houses,<br>containers<br>pecans | pome fruits<br>root vegetables<br>seed treatment<br>sod farms<br>soybeans<br>stone fruits<br>strawberries<br>sugar beets<br>tobacco<br>vine climbing small fruits<br>tropical fruit<br>tuberous and corm vegetables | artichokes<br>barley<br>bush berries<br>cane berries<br>Christmas trees<br>citrus<br>cotton<br>cranberries<br>leafy green vegetables<br>low growing berries<br>mint/spearmint/ peppermint<br>ornamentals in greenhouses, lath-<br>and shade-houses, containers<br>pecans | pome fruits<br>root vegetables<br>seed treatment<br>sod farms<br>soybeans<br>stone fruits<br>strawberries<br>sugar beets<br>tobacco<br>vine climbing small fruits<br>tropical fruit<br>tuberous and corm vegetables |

<sup>3</sup>EPA registered pesticide use information obtained from supporting documents for neonicotinoid pesticide registration review.

Table adapted from EPA, Pollinator Protection: Schedule for Review of Neonicotinoid Pesticides.<sup>2</sup>

Table S-2. Dietary exposure and tolerance levels for neonicotinoids

| Neonicotinoid | WHO ADI<br>mg/kg bw | CODEX MRL<br>mg/kg                                                       | EPA Acute Dietary<br>NOAEL (RfD)<br>mg/kg/day | EPA Chronic<br>Dietary NOAEL<br>(RfD)<br>mg/kg/day | Acute Population<br>Adjusted Dose<br>%<br>General<br>Population (1-2<br>Year Old) | Chronic Population<br>Adjusted Dose<br>%<br>General<br>Population (1-2<br>Year Old) |
|---------------|---------------------|--------------------------------------------------------------------------|-----------------------------------------------|----------------------------------------------------|-----------------------------------------------------------------------------------|-------------------------------------------------------------------------------------|
| Acetamiprid   | 0 – 0.07            | 0.01 (poultry) – 40<br>(sweet corn fodder)                               | 10 <sup>a</sup> (0.1)                         | 7.1 <sup>a</sup> (0.071)                           | 38 (87)                                                                           | 18 (52)                                                                             |
| Clothianidin  | 0 – 0.1             | 0.01 (poultry, sweet<br>corn, and other items)<br>– 2 (leafy vegetables) | 25 <sup>b</sup> (0.25)                        | 9.8 <sup>a</sup> (0.098)                           | 9 (29)                                                                            | 4 (9)                                                                               |
| Dinotefuran   | 0 – 0.2             | 0.02 (poultry) – 8<br>(rice)                                             | 125 <sup>b</sup> (1.25)                       | 99.7 <sup>a</sup> (1.0)                            | 3.7 (12)                                                                          | 1.7 (6)                                                                             |
| Imidacloprid  | 0 – 0.06            | 0.02 (poultry, sweet<br>corn) – 50 (tea, soya<br>bean fodder)            | 8 <sup>b</sup> (0.08)                         | 8 <sup>a</sup> (0.08)                              | 38 (93)                                                                           | 5.6 (12)                                                                            |
| Nitenpyram    | -                   | -                                                                        | -                                             | -                                                  | -                                                                                 | -                                                                                   |
| Thiacloprid   | 0 – 0.01            | 0.02 (eggs, poultry,<br>potato, rice, tree nuts)<br>– 10 (almond hulls)  | 4.4                                           | 1.2                                                | -                                                                                 | -                                                                                   |
| Thiamethoxam  | 0 – 0.08            | 0.01 (eggs, legume,<br>poultry, sweet corn) –<br>20 (tea)                | 34.5 <sup>a</sup> (0.35)                      | 1.2 <sup>a</sup> (0.012)                           | 4 (8)                                                                             | 21 (48)                                                                             |

NOAEL = no-observed-adverse-effect-level; RfD – Reference Dose; <sup>a</sup> For all populations; <sup>b</sup> For general populations

Table adapted from Kathleen A. Lewis, et al., *Human and Ecological Risk Assessment*, 2016. **22**(4): p. 1050-1064.<sup>3</sup>; [World Health Organization, Food and Agriculture Organization, 2019.](#)<sup>4</sup>; and [U.S. Environmental Protection Agency.](#)<sup>5-21</sup>

## References

1. National Pesticide Information Center and Oregon State University, NPIC Product Research Online, <http://npic.orst.edu/NPRO/>, (accessed September 4, 2019).
2. U.S. Environmental Protection Agency, Pollinator Protection: Schedule for Review of Neonicotinoid Pesticides, <https://www.epa.gov/pollinator-protection/schedule-review-neonicotinoid-pesticides>).
3. K. A. Lewis, J. Tzilivakis, D. J. Warner and A. Green, An international database for pesticide risk assessments and management, *Hum. Ecol. Risk Assess.*, 2016, **22**, 1050-1064.
4. World Health Organization, Drinking-water, <https://www.who.int/news-room/fact-sheets/detail/drinking-water>).
5. U.S. Environmental Protection Agency, Acetamiprid. Draft Human Health Risk Assessment for Registration Review *Journal*, 2017.
6. U.S. Environmental Protection Agency, Acetamiprid. Human Health Assessment Scoping Document in Support of Registration Review, <https://www.regulations.gov/document?D=EPA-HQ-OPP-2012-0329-0004>).
7. U.S. Environmental Protection Agency, Clothianidin: Draft Human Health Risk Assessment in Support of Registration, <https://www.regulations.gov/docket?D=EPA-HQ-OPP-2011-0865>).
8. U.S. Environmental Protection Agency, Details for Thiamethoxam Technical, [https://iaspub.epa.gov/apex/pesticides/f?p=PPLS:8:::NO::P8\\_PUID,P8\\_RINUM:37231,100-936](https://iaspub.epa.gov/apex/pesticides/f?p=PPLS:8:::NO::P8_PUID,P8_RINUM:37231,100-936)).
9. U.S. Environmental Protection Agency, Dinotefuran: Human Health Draft Risk Assessment for Registration Review., <https://www.regulations.gov/docket?D=EPA-HQ-OPP-2011-0920>).
10. U.S. Environmental Protection Agency, Imidacloprid: Human Health Draft Risk Assessment for Registration Review, <https://www.regulations.gov/docket?D=EPA-HQ-OPP-2008-0844>).
11. U.S. Environmental Protection Agency, Pesticide Fact Sheet: Acetamiprid, [https://www3.epa.gov/pesticides/chem\\_search/reg\\_actions/registration/fs\\_PC-099050\\_15-Mar-02.pdf](https://www3.epa.gov/pesticides/chem_search/reg_actions/registration/fs_PC-099050_15-Mar-02.pdf)).
12. U.S. Environmental Protection Agency, Pesticide Fact Sheet: Clothianidin, [https://www3.epa.gov/pesticides/chem\\_search/reg\\_actions/registration/fs\\_PC-044309\\_30-May-03.pdf](https://www3.epa.gov/pesticides/chem_search/reg_actions/registration/fs_PC-044309_30-May-03.pdf)).
13. U.S. Environmental Protection Agency, Pesticide Fact Sheet: Dinotefuran, [https://www3.epa.gov/pesticides/chem\\_search/reg\\_actions/registration/fs\\_PC-044312\\_01-Sep-04.pdf](https://www3.epa.gov/pesticides/chem_search/reg_actions/registration/fs_PC-044312_01-Sep-04.pdf)).
14. U.S. Environmental Protection Agency, Pesticide Fact Sheet: Thiacloprid, [https://www3.epa.gov/pesticides/chem\\_search/reg\\_actions/registration/fs\\_PC-014019\\_26-Sep-03.pdf](https://www3.epa.gov/pesticides/chem_search/reg_actions/registration/fs_PC-014019_26-Sep-03.pdf)).
15. U.S. Environmental Protection Agency, Pesticide Tolerances: Acetamiprid, <https://www.regulations.gov/document?D=EPA-HQ-OPP-2011-0792-0005>, (accessed August 22, 2019).
16. U.S. Environmental Protection Agency, Pesticide Tolerances: Clothianidin, <https://www.regulations.gov/document?D=EPA-HQ-OPP-2010-0217-0044>, (accessed August 22, 2019).
17. U.S. Environmental Protection Agency, Pesticide Tolerances: Dinotefuran, <https://www.regulations.gov/document?D=EPA-HQ-OPP-2012-0060-0005>, (accessed August 22, 2019).
18. U.S. Environmental Protection Agency, Pesticide Tolerances: Imidacloprid, <https://www.regulations.gov/document?D=EPA-HQ-OPP-2012-0204-0005>, (accessed August 22, 2019).
19. U.S. Environmental Protection Agency, Pesticide Tolerances: Thiacloprid, <https://www.regulations.gov/document?D=EPA-HQ-OPP-2010-0311-0004>, (accessed August 22, 2019).
20. U.S. Environmental Protection Agency, Pesticide Tolerances: Thiamethoxam, <https://www.regulations.gov/document?D=EPA-HQ-OPP-2015-0705-0006>, (accessed August 22, 2019).
21. U.S. Environmental Protection Agency, Thiamethoxam: Draft Human Health Risk Assessment for Registration Review, <https://www.regulations.gov/docket?D=EPA-HQ-OPP-2011-0581>).
